# Supplementary material for: Amphiphilic block copolymer terminated with pyrene group: from switchable CO2-temperature dual responses to tunable fluorescence
Source: Royal Society of Chemistry journal article supplement (doi:10.1039/c4ra13118e), 2015-01-01
Supplement: c4ra13118e1.pdf [file c4ra13118e1.pdf]

**Amphiphilic block copolymer terminated with pyrene group:  
from switchable CO<sub>2</sub>-temperature dual responses to tunable  
fluorescence**

Weizhong Yuan,<sup>\*a,b</sup> Jin Shen<sup>a</sup> and Hui Zou<sup>a</sup>

<sup>a</sup>Institute of Nano and Bio-polymeric Materials, School of Materials Science and Engineering, Tongji University, 4800 Cao'an Road, Shanghai 201804, People's Republic of China. Fax: +86 21 69584723; Tel: +86 21 69580234; E-mail: [yuanwz@tongji.edu.cn](mailto:yuanwz@tongji.edu.cn)

<sup>b</sup>Key Laboratory of Advanced Civil Materials, Ministry of Education, 4800 Cao'an Road, Shanghai 201804, People's Republic of China. Fax: +86 21 69584723; Tel: +86 21 69580234

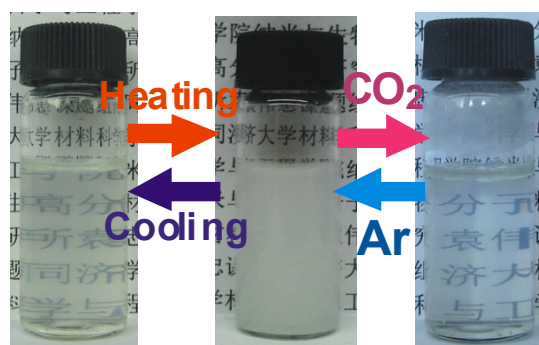

**Fig. S1** The photographs of reversible transparency-turbidity transition of copolymer micelle solution after heating-cooling cycle and bubbling CO<sub>2</sub>-Ar cycle.

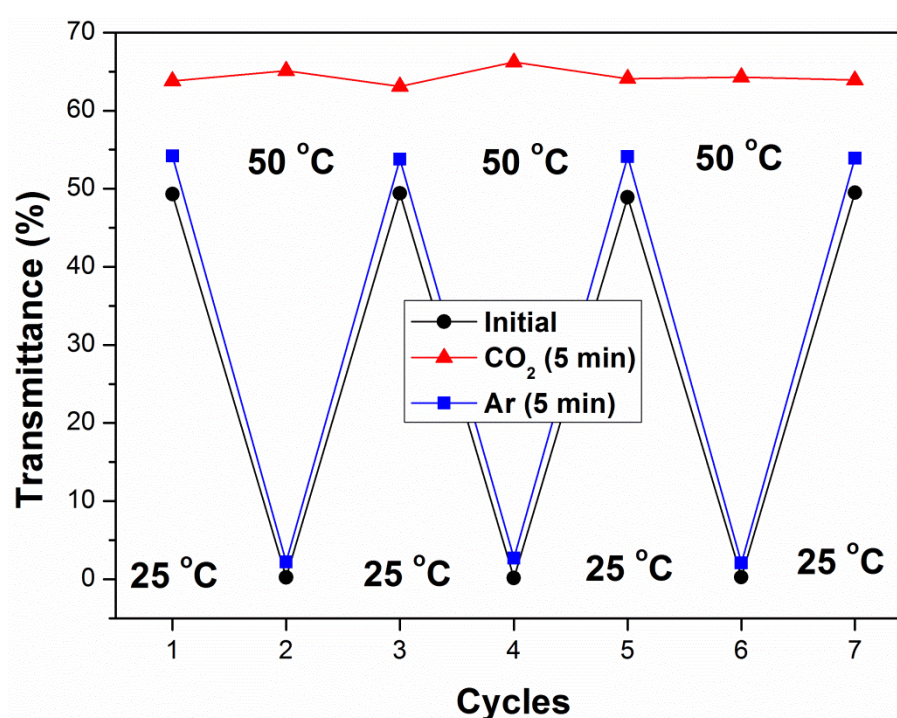

**Fig. S2** The reversible transmittance curves of Py-PCL-*b*-P(NIPAM-*co*-DMAEMA) micelle solutions at 25 °C and 50 °C, respectively.
